# Supplementary material for: Mixed dysprosium-lanthanide nitride clusterfullerenes DyM2N@C80-Ihand Dy2MN@C80-Ih(M = Gd, Er, Tm, and Lu): synthesis, molecular structure, and quantum motion of the endohedral nitrogen atom
Source: Royal Society of Chemistry journal article supplement (doi:10.1039/c9nr03593a), 2019-01-01
Supplement: c9nr03593a1.pdf [file c9nr03593a1.pdf]

**Mixed dysprosium-lanthanide nitride clusterfullerenes  $\text{DyM}_2\text{N@C}_{80-I_h}$  and  $\text{Dy}_2\text{MN@C}_{80-I_h}$  (M = Gd, Er, Tm, and Lu): synthesis, molecular structure, and quantum motion of the endohedral nitrogen atom**

C. Schlesier, F. Liu,\* V. Dubrovin, L. Spree, B. Büchner, S. M. Avdoshenko,\* A. A. Popov\*

**Supporting Information**

|                                                               |     |
|---------------------------------------------------------------|-----|
| Determination of the composition of the mixed-metal fractions | S2  |
| Third ionization potentials of lanthanides                    | S4  |
| HPLC Separation and mass-spectra                              | S5  |
| X-ray diffraction                                             | S8  |
| DFT-optimized coordinates                                     | S10 |
| References                                                    | S26 |

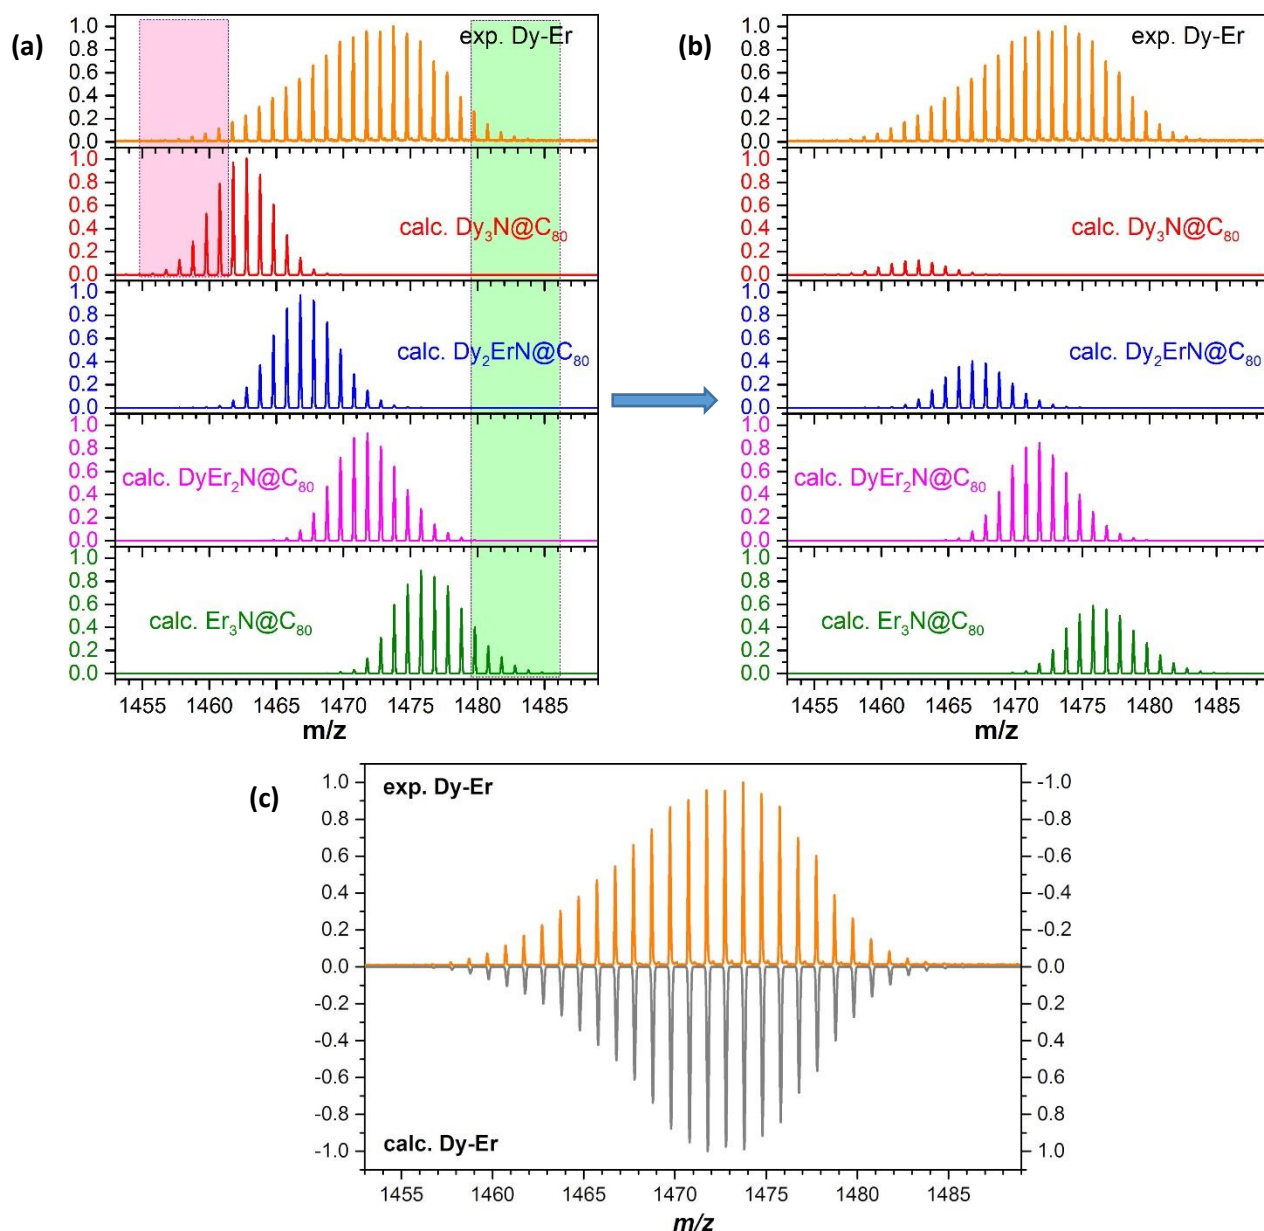

**Figure S1.** Determination of the sample composition based on mass-spectra. (a) Experimental mass-spectrum of the  $\text{Dy}_x\text{Er}_{3-x}\text{N}@C_{80}$  mixture compared to the calculated mass-spectra of all individual molecules. The calculated spectra are normalized to have the same *integral* intensity. Pink and light green rectangles mark the fragments of the mass-spectra of  $\text{Dy}_3\text{N}@C_{80}$  and  $\text{Er}_3\text{N}@C_{80}$ , which do not overlap with the spectra of other species. These regions allow determination of the content of these two NCFs in the mixture. After that, content of  $\text{DyEr}_2\text{N}@C_{80}$  and  $\text{Dy}_2\text{ErN}@C_{80}$  can be estimated straightforwardly. (b) The same as (a), but with the intensities of individual components scaled according to their content in the sample. (c) Sum of the calculated mass-spectra of individual components scaled with their content and compared to the experimental mass-spectrum. Good agreement between experimental and calculated spectra ensures that the procedure provides reasonable determination of the sample composition. Compositions of other mixtures were determined in a similar way. The data are listed in Table S1.

**Table S1.** Relative composition of  $\text{Dy}_x\text{M}_{3-x}\text{N@C}_{80}$  mixtures determined based on the positive-ion LDI mass-spectra using the procedure outlines in Fig. S1 (relative concentration of  $\text{Dy}_3\text{N@C}_{80}$  in each mixture is assumed to be equal 1). The graphical representation of these data is shown in Fig. 4.

|                               | M = Sc | M = Lu | M = Tm | M = Er | M = Gd | Binominal distribution |
|-------------------------------|--------|--------|--------|--------|--------|------------------------|
| $\text{Dy}_3\text{N@C}_{80}$  | 1      | 1      | 1      | 1      | 1      | 1                      |
| $\text{Dy}_2\text{MN@C}_{80}$ | 18     | 7.3    | 0.44   | 3.4    | 0.92   | 3                      |
| $\text{DyM}_2\text{N@C}_{80}$ | 42     | 19.7   | 0.30   | 7.4    | 0.42   | 3                      |
| $\text{M}_3\text{N@C}_{80}$   | 28     | 18.9   | 0.18   | 5.4    | 0.11   | 1                      |

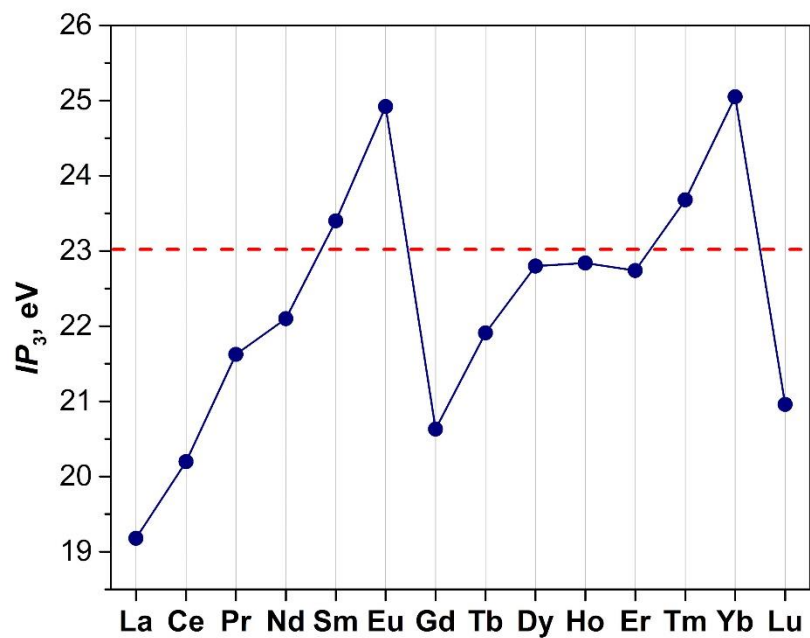

**Figure S2.** Third ionization potentials ( $IP_3$ ) of lanthanides. Dashed red line marks the border at 23 eV between divalent and trivalent lanthanide in EMFs.

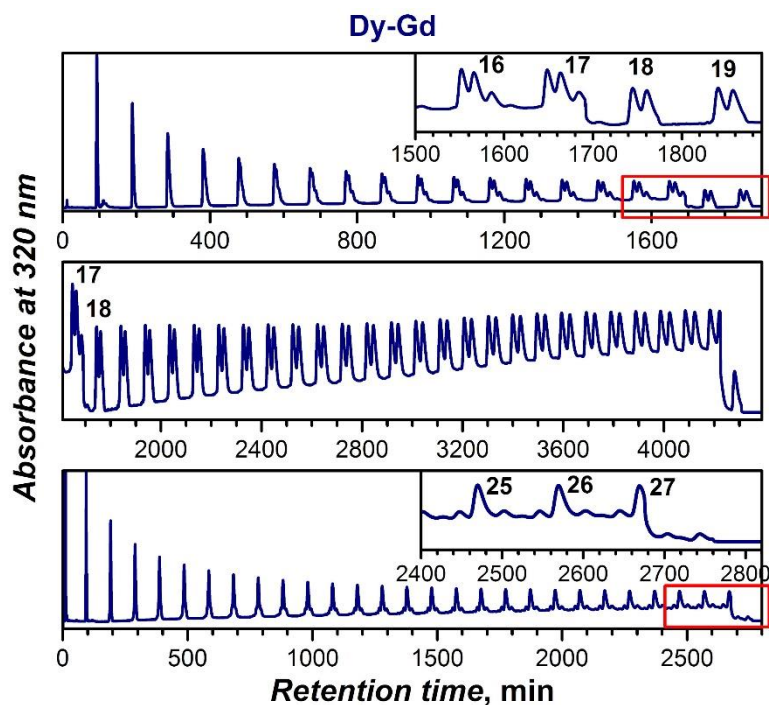

**Figure S3.** Recycling HPLC chromatograms of  $\text{Dy}_x\text{Gd}_{3-x}\text{N}@C_{80}$  mixture ( $x = 0-3$ ) (semipreparative BuckyPrep column, toluene as eluent, 25 °C, flow rate 1.0 mL/min). Insets show enlarged fragment of the chromatograms highlighted with red rectangles.  $\text{Gd}_3\text{N}@C_{80}$  and  $\text{DyGd}_2\text{N}@C_{80}$  are collected at the 17<sup>th</sup> cycle (top panel). The mixture of  $\text{Dy}_2\text{GdN}@C_{80}$  and  $\text{Dy}_3\text{N}@C_{80}$  was processed for additional 26 cycles, which allowed the separation of pure components (middle panel). The mixture of  $\text{Gd}_3\text{N}@C_{80}$  and  $\text{DyGd}_2\text{N}@C_{80}$  was processed with recycling HPLC as well, giving pure  $\text{DyGd}_2\text{N}@C_{80}$  after 27 cycles (bottom).

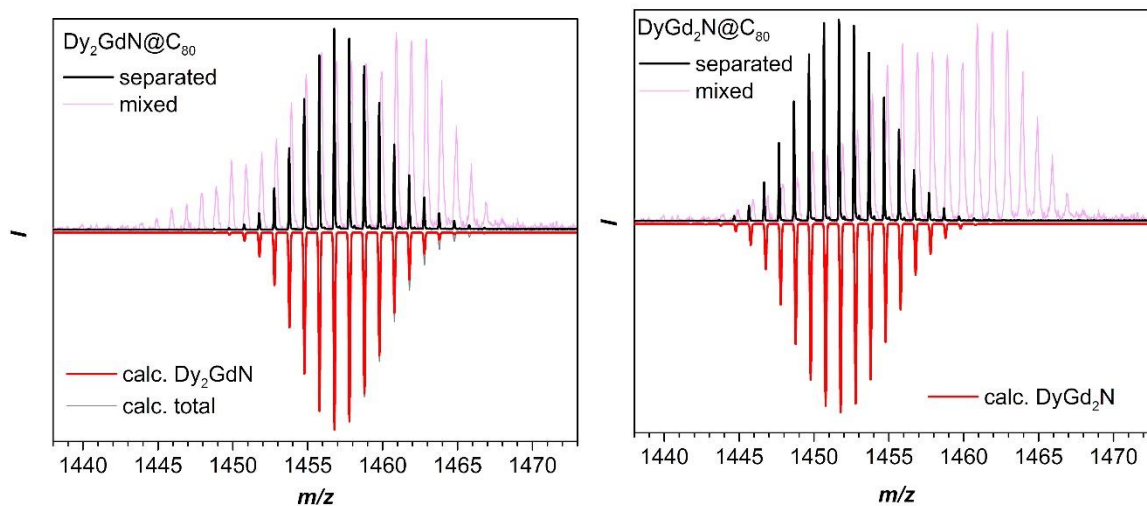

**Figure S4.** Experimental (black) and calculated (red) LDI mass-spectra of purified  $\text{Dy}_2\text{GdN}@C_{80}$  (left) and  $\text{DyGd}_2\text{N}@C_{80}$  (right). Also shown are mass-spectra of the whole  $\text{Dy}_x\text{Gd}_{3-x}\text{N}@C_{80}$  fraction ( $x = 0-3$ , light magenta lines) before separation by recycling HPLC. Gray line in the left panel show calculated spectrum of  $\text{Dy}_2\text{GdN}@C_{80}$  with 5% admixture of  $\text{Dy}_3\text{N}@C_{80}$ .

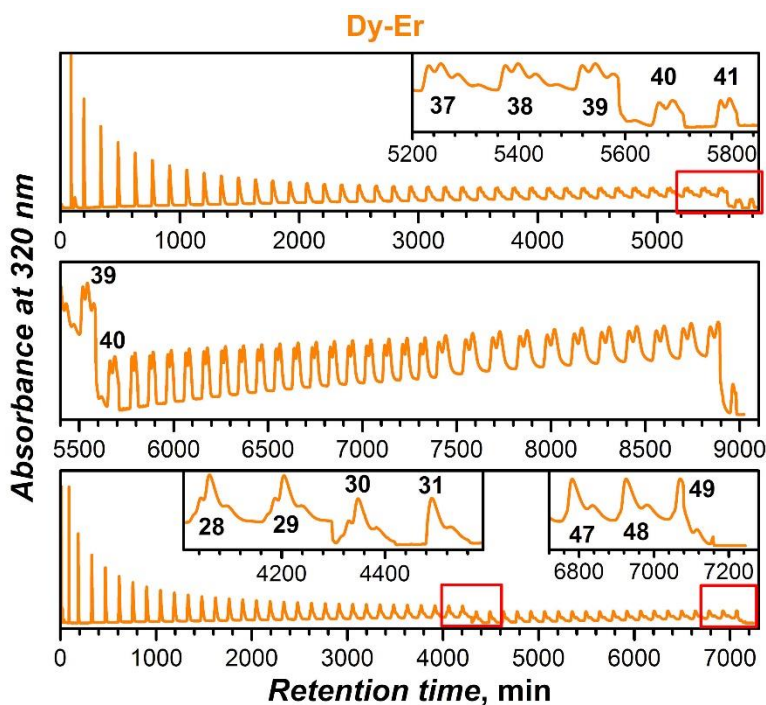

**Figure S5.** Recycling HPLC chromatograms of  $\text{Dy}_x\text{Er}_{3-x}\text{N}@C_{80}$  mixture ( $x = 0-3$ ) (semipreparative BuckyPrep column, toluene as eluent, 25 °C, flow rate 1.0 mL/min). Insets show enlarged fragment of the chromatograms highlighted with red rectangles.  $\text{Dy}_3\text{N}@C_{80}$  and  $\text{Dy}_2\text{ErN}@C_{80}$  are collected at the 39<sup>th</sup> cycle (top). The mixture of  $\text{DyEr}_2\text{N}@C_{80}$  and  $\text{Er}_3\text{N}@C_{80}$  was processed for after additional 29 cycles, allowing isolation of pure compounds (middle). The mixture of  $\text{Dy}_3\text{N}@C_{80}$  and  $\text{Dy}_2\text{ErN}@C_{80}$  was processed with recycling HPLC as well, allowing isolation of  $\text{Dy}_2\text{ErN}@C_{80}$  after 49 cycles (bottom).

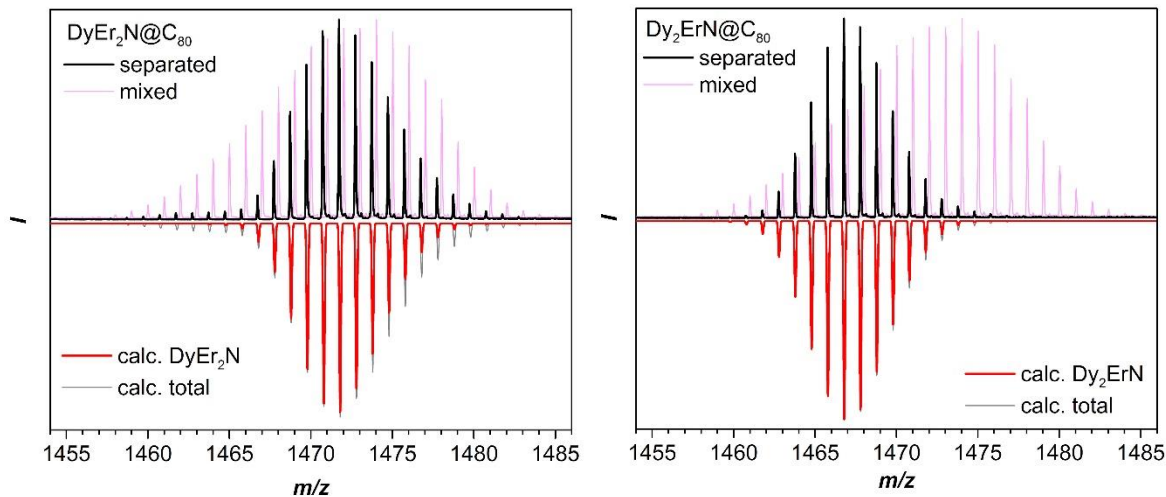

**Figure S6.** Experimental (black) and calculated (red) LDI mass-spectra of purified  $\text{DyEr}_2\text{N}@C_{80}$  (left) and  $\text{Dy}_2\text{ErN}@C_{80}$  (right). Also shown are mass-spectra of the whole  $\text{Dy}_x\text{Er}_{3-x}\text{N}@C_{80}$  fraction ( $x = 0-3$ , light magenta lines) before separation by recycling HPLC. Gray lines show calculated spectra of  $\text{DyEr}_2\text{N}@C_{80}$  with 10% admixture of  $\text{Er}_3\text{N}@C_{80}$  (left) and  $\text{Dy}_2\text{ErN}@C_{80}$  with 4% admixture of  $\text{DyEr}_2\text{N}@C_{80}$  (right).

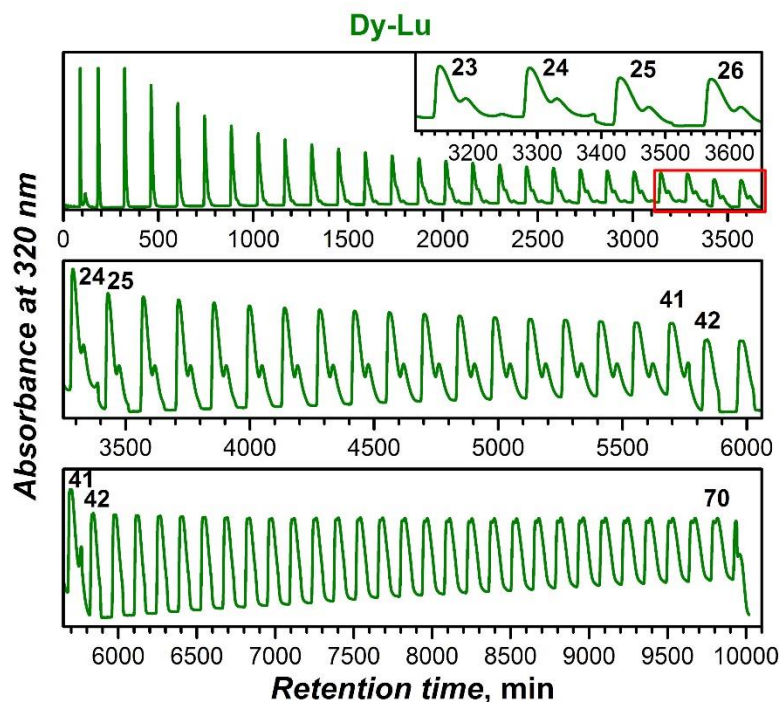

**Figure S7.** Recycling HPLC chromatograms of  $\text{Dy}_x\text{Lu}_{3-x}\text{N}@C_{80}$  mixture ( $x = 0-3$ ) (semipreparative BuckyPrep column, toluene as eluent, 25 °C, flow rate 1.0 mL/min). Insets show enlarged fragment of the chromatograms highlighted with red rectangles.  $\text{Dy}_3\text{N}@C_{80}$  was collected at the 24<sup>th</sup> cycle (top).  $\text{Dy}_2\text{LuN}@C_{80}$  was collected at the 42<sup>nd</sup> cycle (middle). The mixture of remaining  $\text{DyLu}_2\text{N}@C_{80}$  and  $\text{Lu}_3\text{N}@C_{80}$  still shows no sufficient resolution of peaks after 70 cycles.

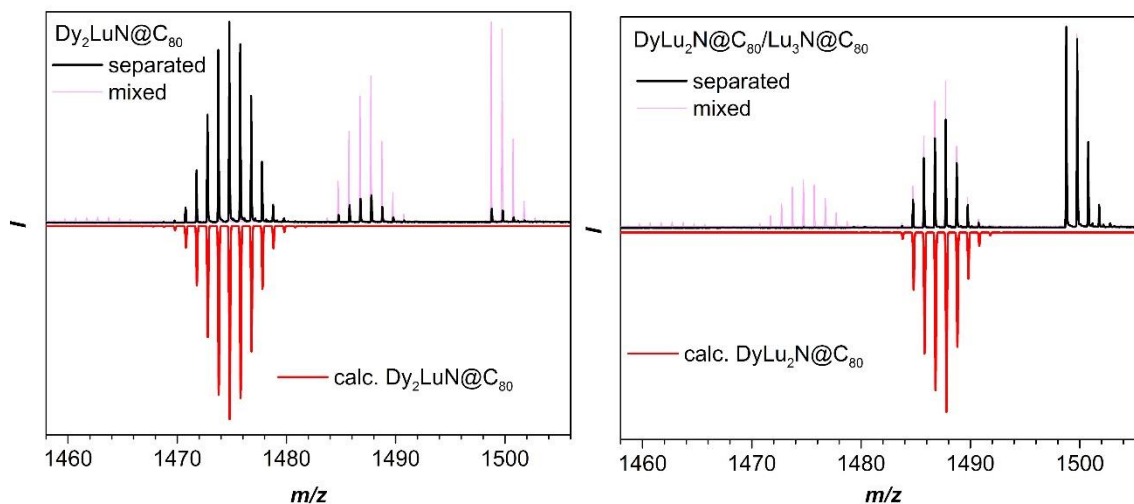

**Figure S8.** Experimental (black) and calculated (red) LDI mass-spectra of isolated  $\text{Dy}_2\text{LuN}@C_{80}$  (left) and  $\text{DyLu}_2\text{N}@C_{80}/\text{Lu}_3\text{N}@C_{80}$  mixture (right). Light magenta lines shows mass-spectrum of the whole  $\text{Dy}_x\text{Lu}_{3-x}\text{N}@C_{80}$  fraction ( $x = 0-3$ ) before separation by recycling HPLC. The sample of  $\text{Dy}_2\text{LuN}@C_{80}$  still contains ca 10%  $\text{DyLu}_2\text{N}@C_{80}$  and 3%  $\text{Lu}_3\text{N}@C_{80}$ . The molar ratio of  $\text{DyLu}_2\text{N}@C_{80}$  and  $\text{Lu}_3\text{N}@C_{80}$  is estimated to be 1:1.35.



## Single-crystal X-ray diffraction

Single crystals of DyEr<sub>2</sub>N@C<sub>80</sub> and DyGd<sub>2</sub>N@C<sub>80</sub> were grown by co-crystallization with Ni<sup>II</sup>(OEP) (OEP = octaethylporphyrin), by layering benzene solution of Ni<sup>II</sup>(OEP) over a benzene solution of DyEr<sub>2</sub>N@C<sub>80</sub> or DyGd<sub>2</sub>N@C<sub>80</sub>. Black blocks of crystals formed after the fullerene and Ni<sup>II</sup>(OEP) solutions diffused together over a period of ca. one month. X-ray diffraction data collection for the crystal was carried out at 100 K at the BESSY storage ring (BL14.3, Berlin-Adlershof, Germany)<sup>1</sup> using a MAR225 CCD detector,  $\lambda = 0.89429$  Å. Processing diffraction data was done with XDSAPP2.0 suite.<sup>2</sup> The structure was solved by direct methods and refined using all data (based on F<sup>2</sup>) by SHELX 2018.<sup>3</sup> Hydrogen atoms were located in a difference map, added geometrically, and refined with a riding model. The crystal data and collection parameters are presented in Table S2. The data can be obtained free of charge from the Cambridge Crystallographic Data Centre with CCDC Nos. 1874408 and 1874409.

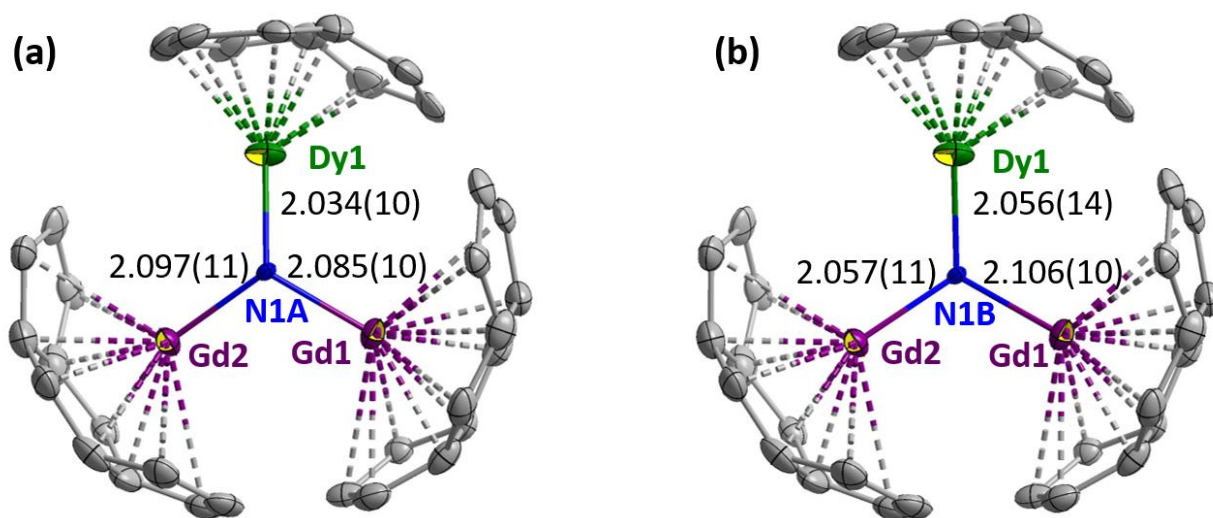

**Figure S9.** (a) The main DyGd<sub>2</sub>N site coordinated cage carbons and metal-nitrogen bond lengths (in Å). Bond angles:  $\angle \text{Dy1N1AGd1} = 116.8(5)^\circ$ ,  $\angle \text{Dy1N1AGd2} = 118.0(5)^\circ$ ,  $\angle \text{Gd1N1AGd2} = 111.1(5)^\circ$ ; (b) The minor DyGd<sub>2</sub>N site coordinated cage carbons and metal-nitrogen bond lengths (in Å). Bond angles:  $\angle \text{Dy1N1BGd1} = 115.0(5)^\circ$ ,  $\angle \text{Dy1N1BGd2} = 118.9(5)^\circ$ ,  $\angle \text{Gd1N1BGd2} = 111.9(5)^\circ$ . The displacement parameters are shown at the 30% probability level.



Table S2. Crystal data

|                                                                | DyGd <sub>2</sub> N@I <sub>h</sub> (7)-C <sub>80</sub> ·Ni <sup>II</sup> (OEP)·2(C <sub>6</sub> H <sub>6</sub> ) | DyEr <sub>2</sub> N@I <sub>h</sub> (7)-C <sub>80</sub> ·Ni <sup>II</sup> (OEP)·2(C <sub>6</sub> H <sub>6</sub> ) |
|----------------------------------------------------------------|------------------------------------------------------------------------------------------------------------------|------------------------------------------------------------------------------------------------------------------|
| <b>Formula</b>                                                 | C128 H56 Dy Gd <sub>2</sub> N5 Ni                                                                                | C128 H56 Dy Er <sub>2</sub> N5 Ni                                                                                |
| <b>Formula weight</b>                                          | 2199.48                                                                                                          | 2219.50                                                                                                          |
| <b>Color, habit</b>                                            | Black, block                                                                                                     | Black, block                                                                                                     |
| <b>Crystal system</b>                                          | monoclinic                                                                                                       | monoclinic                                                                                                       |
| <b>Space group</b>                                             | <i>C2/c</i>                                                                                                      | <i>C2/c</i>                                                                                                      |
| <b><i>a</i>, Å</b>                                             | 25.230(5)                                                                                                        | 25.170(5)                                                                                                        |
| <b><i>b</i>, Å</b>                                             | 15.050(3)                                                                                                        | 15.030(3)                                                                                                        |
| <b><i>c</i>, Å</b>                                             | 39.410(8)                                                                                                        | 39.410(8)                                                                                                        |
| <b><i>α</i>, deg</b>                                           | 90                                                                                                               | 90                                                                                                               |
| <b><i>β</i>, deg</b>                                           | 95.27(3)                                                                                                         | 95.16(3)                                                                                                         |
| <b><i>γ</i>, deg</b>                                           | 90                                                                                                               | 90                                                                                                               |
| <b>Volume, Å<sup>3</sup></b>                                   | 14901(5)                                                                                                         | 14849(5)                                                                                                         |
| <b><i>Z</i></b>                                                | 8                                                                                                                | 8                                                                                                                |
| <b><i>T</i>, K</b>                                             | 100                                                                                                              | 100                                                                                                              |
| <b>Radiation (λ, Å)</b>                                        | Synchrotron Radiation (0.89429)                                                                                  | Synchrotron Radiation (0.89429)                                                                                  |
| <b>Unique data (<i>R</i><sub>int</sub>)</b>                    | 16935 (0.0574)                                                                                                   | 13710 (0.1252)                                                                                                   |
| <b>Parameters</b>                                              | 1253                                                                                                             | 1262                                                                                                             |
| <b>Restraints</b>                                              | 6                                                                                                                | 1224                                                                                                             |
| <b>Observed data</b>                                           | 10331                                                                                                            | 9685                                                                                                             |
| <b><i>R</i><sub>1</sub><sup><i>a</i></sup> (observed data)</b> | 0.0659                                                                                                           | 0.1104                                                                                                           |
| <b><i>wR</i><sub>2</sub><sup><i>b</i></sup> (all data)</b>     | 0.2057                                                                                                           | 0.2825                                                                                                           |
| <b>CCDC NO.</b>                                                | 1874409                                                                                                          | 1874408                                                                                                          |

<sup>a</sup>For data with  $I > 2\sigma(I)$ ,  $R_1 = \frac{\sum(|F_o| - |F_c|)}{\sum|F_o|}$ . <sup>b</sup>For all data,  $wR_2 = \sqrt{\frac{\sum[w(F_o^2 - F_c^2)^2]}{\sum[w(F_o^2)^2]}}$ .

## DFT-optimized coordinates

### DyEr<sub>2</sub>N@C<sub>80</sub>

|   |              |              |              |
|---|--------------|--------------|--------------|
| C | 0.969096000  | 2.199761000  | -3.265338000 |
| C | 2.107671000  | 2.478957000  | -2.433649000 |
| C | 2.977668000  | 1.319498000  | -2.434823000 |
| C | 1.120032000  | 0.867366000  | -3.784221000 |
| C | 2.350735000  | 0.326779000  | -3.276404000 |
| C | -0.014796000 | 0.030208000  | -3.999550000 |
| C | -1.307040000 | 0.595356000  | -3.783709000 |
| C | -0.322334000 | 2.735189000  | -2.969301000 |
| C | -1.454645000 | 1.931616000  | -3.275708000 |
| C | -0.450886000 | 3.653421000  | -1.857404000 |
| C | 1.979735000  | 3.295784000  | -1.284113000 |
| C | 0.689654000  | 3.894024000  | -1.018035000 |
| C | 2.816709000  | 2.983594000  | -0.173670000 |
| C | 3.822856000  | 0.973540000  | -1.321416000 |
| C | 3.721963000  | 1.847608000  | -0.177646000 |
| C | 4.111108000  | -0.442330000 | -1.074047000 |
| C | 2.480590000  | -1.055313000 | -2.969077000 |
| C | 3.340286000  | -1.403126000 | -1.857255000 |
| C | 0.142861000  | -1.371606000 | -3.783727000 |
| C | 1.372231000  | -1.907082000 | -3.265099000 |
| C | -0.939912000 | -2.167079000 | -3.275430000 |
| C | -2.385189000 | -0.201538000 | -3.264923000 |
| C | -2.201243000 | -1.587473000 | -2.968606000 |
| C | -2.628868000 | 1.979313000  | -2.434478000 |
| C | -3.196518000 | 0.645009000  | -2.433532000 |
| C | -1.668342000 | 3.838264000  | -1.072963000 |
| C | -2.755119000 | 2.886582000  | -1.322034000 |
| C | 0.215804000  | 4.177893000  | 0.312760000  |
| C | -1.253426000 | 4.192373000  | 0.314294000  |
| C | 2.337542000  | 3.186044000  | 1.161058000  |
| C | 1.033464000  | 3.732883000  | 1.424054000  |
| C | 3.796996000  | 1.333334000  | 1.185489000  |
| C | 2.910387000  | 2.160134000  | 1.990846000  |
| C | 4.215102000  | -0.979820000 | 0.313702000  |
| C | 4.002902000  | -0.078426000 | 1.464014000  |
| C | 2.979356000  | -2.511494000 | -1.017524000 |
| C | 3.466086000  | -2.245160000 | 0.312374000  |
| C | 1.045678000  | -3.032986000 | -2.433338000 |
| C | -0.393724000 | -3.207394000 | -2.433920000 |
| C | 1.816838000  | -3.331020000 | -1.283783000 |
| C | -1.115974000 | -3.771901000 | -1.322613000 |

|    |              |              |              |
|----|--------------|--------------|--------------|
| C  | -2.929805000 | -2.158047000 | -1.855792000 |
| C  | -2.484926000 | -3.307922000 | -1.073870000 |
| C  | -3.837163000 | 0.126052000  | -1.282701000 |
| C  | -3.705838000 | -1.289553000 | -1.015641000 |
| C  | -3.462198000 | 2.362902000  | -0.176826000 |
| C  | -3.987344000 | 1.007699000  | -0.172606000 |
| C  | -1.929425000 | 3.563826000  | 1.465681000  |
| C  | -3.053135000 | 2.683987000  | 1.187733000  |
| C  | 0.350343000  | 3.262331000  | 2.574601000  |
| C  | -1.096516000 | 3.124951000  | 2.563030000  |
| C  | 2.175997000  | 1.640307000  | 3.097704000  |
| C  | 0.911186000  | 2.233394000  | 3.406886000  |
| C  | 3.205257000  | -0.579404000 | 2.560469000  |
| C  | 2.362248000  | 0.260300000  | 3.390122000  |
| C  | 2.669150000  | -2.728815000 | 1.423016000  |
| C  | 2.601485000  | -1.901027000 | 2.572788000  |
| C  | 1.128575000  | -3.901436000 | -0.173356000 |
| C  | -0.308121000 | -4.122402000 | -0.177666000 |
| C  | 1.543498000  | -3.585351000 | 1.160596000  |
| C  | -0.790527000 | -3.927719000 | 1.186779000  |
| C  | 0.368477000  | -3.568444000 | 1.990600000  |
| C  | -2.998679000 | -3.124819000 | 0.314554000  |
| C  | -3.715754000 | -1.842692000 | 0.313665000  |
| C  | -2.114737000 | -3.394722000 | 1.465355000  |
| C  | -3.920982000 | 0.490277000  | 1.161536000  |
| C  | -3.321095000 | 1.500205000  | 1.991953000  |
| C  | -3.740906000 | -0.912106000 | 1.424470000  |
| C  | -1.401554000 | 1.974424000  | 3.392517000  |
| C  | -0.172139000 | 1.434423000  | 3.903768000  |
| C  | -2.503094000 | 1.122985000  | 3.098777000  |
| C  | 1.280972000  | -0.534286000 | 3.902602000  |
| C  | 1.430987000  | -1.872134000 | 3.405774000  |
| C  | 0.285537000  | -2.671651000 | 3.097385000  |
| C  | -0.013320000 | 0.030696000  | 4.121640000  |
| C  | -2.149943000 | -2.452659000 | 2.561217000  |
| C  | -2.992993000 | -1.268859000 | 2.574707000  |
| C  | -2.382907000 | -0.269303000 | 3.407179000  |
| C  | -1.001858000 | -2.142520000 | 3.391035000  |
| C  | -1.149217000 | -0.808405000 | 3.903535000  |
| N  | 0.000000000  | 0.000000000  | 0.000000000  |
| Dy | -0.897930000 | 1.863980000  | 0.058501000  |
| Er | 2.042670000  | -0.149801000 | 0.060398000  |
| Er | -1.170016000 | -1.682112000 | 0.053474000  |

**Dy<sub>2</sub>ErN@C<sub>80</sub>**

|   |              |              |              |
|---|--------------|--------------|--------------|
| C | 1.002304000  | 2.196324000  | -3.235803000 |
| C | 2.141559000  | 2.475780000  | -2.405255000 |
| C | 3.013419000  | 1.316811000  | -2.406325000 |
| C | 1.153401000  | 0.864019000  | -3.753848000 |
| C | 2.384797000  | 0.323599000  | -3.246702000 |
| C | 0.018259000  | 0.027470000  | -3.969201000 |
| C | -1.274142000 | 0.592539000  | -3.753613000 |
| C | -0.289558000 | 2.731996000  | -2.940289000 |
| C | -1.422058000 | 1.928812000  | -3.246401000 |
| C | -0.419133000 | 3.650815000  | -1.829156000 |
| C | 2.012420000  | 3.291546000  | -1.255615000 |
| C | 0.721627000  | 3.889161000  | -0.989592000 |
| C | 2.851233000  | 2.978939000  | -0.146068000 |
| C | 3.862889000  | 0.971981000  | -1.294559000 |
| C | 3.763188000  | 1.846849000  | -0.149930000 |
| C | 4.147025000  | -0.445275000 | -1.046103000 |
| C | 2.515092000  | -1.058767000 | -2.940283000 |
| C | 3.376762000  | -1.407272000 | -1.829972000 |
| C | 0.175771000  | -1.373983000 | -3.753546000 |
| C | 1.405318000  | -1.909480000 | -3.235488000 |
| C | -0.907289000 | -2.169735000 | -3.246068000 |
| C | -2.352253000 | -0.204380000 | -3.235011000 |
| C | -2.168830000 | -1.590644000 | -2.939199000 |
| C | -2.597029000 | 1.977554000  | -2.405555000 |
| C | -3.164175000 | 0.642280000  | -2.404575000 |
| C | -1.637913000 | 3.839427000  | -1.046284000 |
| C | -2.726959000 | 2.888441000  | -1.295744000 |
| C | 0.247506000  | 4.172856000  | 0.340478000  |
| C | -1.221976000 | 4.191798000  | 0.342247000  |
| C | 2.370423000  | 3.180521000  | 1.187854000  |
| C | 1.065982000  | 3.728043000  | 1.450897000  |
| C | 3.839047000  | 1.332450000  | 1.214632000  |
| C | 2.946283000  | 2.156449000  | 2.018044000  |
| C | 4.249833000  | -0.982523000 | 0.341694000  |
| C | 4.042492000  | -0.080969000 | 1.493132000  |
| C | 3.015788000  | -2.516070000 | -0.990640000 |
| C | 3.501022000  | -2.248415000 | 0.339741000  |
| C | 1.078440000  | -3.035412000 | -2.404312000 |
| C | -0.361132000 | -3.210217000 | -2.405214000 |
| C | 1.850896000  | -3.333558000 | -1.255712000 |
| C | -1.084111000 | -3.774407000 | -1.294209000 |
| C | -2.899178000 | -2.162146000 | -1.827604000 |
| C | -2.455002000 | -3.313183000 | -1.046015000 |

|    |              |              |              |
|----|--------------|--------------|--------------|
| C  | -3.805845000 | 0.123087000  | -1.254635000 |
| C  | -3.676082000 | -1.293680000 | -0.987706000 |
| C  | -3.435140000 | 2.364555000  | -0.149556000 |
| C  | -3.955981000 | 1.006396000  | -0.145351000 |
| C  | -1.899379000 | 3.564711000  | 1.494470000  |
| C  | -3.025507000 | 2.685620000  | 1.216249000  |
| C  | 0.382979000  | 3.259403000  | 2.601481000  |
| C  | -1.064499000 | 3.122979000  | 2.589779000  |
| C  | 2.210188000  | 1.637059000  | 3.124505000  |
| C  | 0.944468000  | 2.229969000  | 3.432633000  |
| C  | 3.242612000  | -0.582396000 | 2.589047000  |
| C  | 2.397127000  | 0.257208000  | 3.417499000  |
| C  | 2.703677000  | -2.731925000 | 1.450291000  |
| C  | 2.636888000  | -1.903816000 | 2.599971000  |
| C  | 1.161258000  | -3.903281000 | -0.145707000 |
| C  | -0.275679000 | -4.124611000 | -0.149758000 |
| C  | 1.576344000  | -3.587313000 | 1.187916000  |
| C  | -0.758809000 | -3.931684000 | 1.214612000  |
| C  | 0.400983000  | -3.571200000 | 2.017618000  |
| C  | -2.971459000 | -3.132638000 | 0.342853000  |
| C  | -3.688362000 | -1.848428000 | 0.341474000  |
| C  | -2.085013000 | -3.401768000 | 1.493894000  |
| C  | -3.888016000 | 0.488016000  | 1.188018000  |
| C  | -3.288816000 | 1.498725000  | 2.018365000  |
| C  | -3.709458000 | -0.915493000 | 1.451020000  |
| C  | -1.368688000 | 1.971663000  | 3.418569000  |
| C  | -0.139038000 | 1.431258000  | 3.929216000  |
| C  | -2.470172000 | 1.120527000  | 3.124695000  |
| C  | 1.314501000  | -0.537026000 | 3.928087000  |
| C  | 1.464672000  | -1.874524000 | 3.431403000  |
| C  | 0.318713000  | -2.673877000 | 3.123486000  |
| C  | 0.019866000  | 0.027746000  | 4.146497000  |
| C  | -2.118285000 | -2.456932000 | 2.588161000  |
| C  | -2.960536000 | -1.271985000 | 2.600706000  |
| C  | -2.349877000 | -0.271956000 | 3.432318000  |
| C  | -0.969175000 | -2.145250000 | 3.416575000  |
| C  | -1.116219000 | -0.811076000 | 3.928316000  |
| N  | 0.000000000  | 0.000000000  | 0.000000000  |
| Dy | -0.888873000 | 1.861380000  | 0.082952000  |
| Dy | 2.057333000  | -0.135712000 | 0.090228000  |
| Er | -1.153281000 | -1.685241000 | 0.086124000  |

**Dy<sub>3</sub>N@C<sub>80</sub>**

|   |              |              |              |
|---|--------------|--------------|--------------|
| C | 0.983880000  | 2.168670000  | -3.118700000 |
| C | 2.123617000  | 2.448664000  | -2.289188000 |
| C | 2.996536000  | 1.289857000  | -2.290345000 |
| C | 1.134884000  | 0.836364000  | -3.636329000 |
| C | 2.366685000  | 0.296452000  | -3.130744000 |
| C | -0.000773000 | -0.000032000 | -3.851009000 |
| C | -1.292777000 | 0.565526000  | -3.635933000 |
| C | -0.308053000 | 2.704501000  | -2.823449000 |
| C | -1.440933000 | 1.902217000  | -3.130156000 |
| C | -0.436781000 | 3.623047000  | -1.712130000 |
| C | 1.995117000  | 3.264524000  | -1.139807000 |
| C | 0.704106000  | 3.862263000  | -0.873120000 |
| C | 2.835333000  | 2.951513000  | -0.030699000 |
| C | 3.849929000  | 0.946829000  | -1.180253000 |
| C | 3.752790000  | 1.822677000  | -0.034229000 |
| C | 4.129228000  | -0.471984000 | -0.930269000 |
| C | 2.495021000  | -1.085741000 | -2.823672000 |
| C | 3.355639000  | -1.433137000 | -1.712959000 |
| C | 0.155497000  | -1.401679000 | -3.635443000 |
| C | 1.384967000  | -1.936887000 | -3.118140000 |
| C | -0.927681000 | -2.198359000 | -3.129124000 |
| C | -2.370772000 | -0.231493000 | -3.117453000 |
| C | -2.188783000 | -1.618329000 | -2.822217000 |
| C | -2.615734000 | 1.950927000  | -2.289031000 |
| C | -3.182453000 | 0.615420000  | -2.287363000 |
| C | -1.655616000 | 3.812380000  | -0.928896000 |
| C | -2.745014000 | 2.861440000  | -1.178747000 |
| C | 0.229722000  | 4.147821000  | 0.456710000  |
| C | -1.240748000 | 4.168325000  | 0.459502000  |
| C | 2.352712000  | 3.151776000  | 1.302446000  |
| C | 1.048198000  | 3.700708000  | 1.566001000  |
| C | 3.829250000  | 1.307944000  | 1.332042000  |
| C | 2.930335000  | 2.128526000  | 2.132886000  |
| C | 4.230627000  | -1.008915000 | 0.458196000  |
| C | 4.029005000  | -0.107403000 | 1.610920000  |
| C | 2.993034000  | -2.540812000 | -0.873563000 |
| C | 3.477858000  | -2.272160000 | 0.455934000  |
| C | 1.058125000  | -3.063543000 | -2.288078000 |
| C | -0.381763000 | -3.240325000 | -2.288885000 |
| C | 1.829610000  | -3.359987000 | -1.139002000 |
| C | -1.104901000 | -3.807933000 | -1.178431000 |
| C | -2.919164000 | -2.189410000 | -1.710586000 |
| C | -2.473124000 | -3.339745000 | -0.927765000 |

|    |              |              |              |
|----|--------------|--------------|--------------|
| C  | -3.824347000 | 0.095924000  | -1.137868000 |
| C  | -3.696441000 | -1.321123000 | -0.871274000 |
| C  | -3.454071000 | 2.338899000  | -0.032432000 |
| C  | -3.973150000 | 0.979915000  | -0.028666000 |
| C  | -1.919997000 | 3.542593000  | 1.612600000  |
| C  | -3.045826000 | 2.661994000  | 1.333808000  |
| C  | 0.365019000  | 3.232784000  | 2.716615000  |
| C  | -1.083214000 | 3.097719000  | 2.705719000  |
| C  | 2.192750000  | 1.609756000  | 3.239240000  |
| C  | 0.926942000  | 2.202891000  | 3.547014000  |
| C  | 3.225369000  | -0.609177000 | 2.704320000  |
| C  | 2.378934000  | 0.229941000  | 3.532205000  |
| C  | 2.681950000  | -2.757036000 | 1.565644000  |
| C  | 2.618212000  | -1.930662000 | 2.715780000  |
| C  | 1.139065000  | -3.931181000 | -0.029498000 |
| C  | -0.297450000 | -4.161749000 | -0.032770000 |
| C  | 1.554092000  | -3.612467000 | 1.303097000  |
| C  | -0.781276000 | -3.969766000 | 1.333656000  |
| C  | 0.379188000  | -3.600853000 | 2.133855000  |
| C  | -2.988699000 | -3.158962000 | 0.460588000  |
| C  | -3.705961000 | -1.875113000 | 0.458302000  |
| C  | -2.106809000 | -3.435240000 | 1.613286000  |
| C  | -3.904313000 | 0.461307000  | 1.304186000  |
| C  | -3.306490000 | 1.473012000  | 2.134450000  |
| C  | -3.727441000 | -0.942795000 | 1.567615000  |
| C  | -1.386172000 | 1.944765000  | 3.533142000  |
| C  | -0.156600000 | 1.404116000  | 4.043452000  |
| C  | -2.487822000 | 1.093346000  | 3.240107000  |
| C  | 1.296003000  | -0.564296000 | 4.042954000  |
| C  | 1.445676000  | -1.901931000 | 3.546544000  |
| C  | 0.299178000  | -2.702046000 | 3.239632000  |
| C  | 0.001646000  | 0.000565000  | 4.261183000  |
| C  | -2.139036000 | -2.487721000 | 2.706449000  |
| C  | -2.979830000 | -1.300900000 | 2.717649000  |
| C  | -2.368128000 | -0.299502000 | 3.547658000  |
| C  | -0.988713000 | -2.173643000 | 3.533351000  |
| C  | -1.134702000 | -0.838428000 | 4.043633000  |
| N  | 0.000000000  | 0.000000000  | 0.000000000  |
| Dy | -0.907100000 | 1.841178000  | 0.202814000  |
| Dy | 2.048221000  | -0.134534000 | 0.202385000  |
| Dy | -1.140292000 | -1.706456000 | 0.204740000  |



**Dy<sub>2</sub>GdN@C<sub>80</sub>**

|   |              |              |              |
|---|--------------|--------------|--------------|
| C | 0.965393000  | 2.137505000  | -3.010293000 |
| C | 2.105439000  | 2.418209000  | -2.181719000 |
| C | 2.979807000  | 1.259651000  | -2.182825000 |
| C | 1.116508000  | 0.805394000  | -3.527680000 |
| C | 2.348749000  | 0.266052000  | -3.023585000 |
| C | -0.019782000 | -0.030904000 | -3.741405000 |
| C | -1.311537000 | 0.535119000  | -3.527364000 |
| C | -0.326786000 | 2.673371000  | -2.715299000 |
| C | -1.460135000 | 1.872264000  | -3.022986000 |
| C | -0.454537000 | 3.591031000  | -1.603457000 |
| C | 1.977655000  | 3.234386000  | -1.032653000 |
| C | 0.686367000  | 3.832041000  | -0.765254000 |
| C | 2.819231000  | 2.920878000  | 0.075988000  |
| C | 3.838570000  | 0.919008000  | -1.075059000 |
| C | 3.742973000  | 1.795797000  | 0.072864000  |
| C | 4.112209000  | -0.501712000 | -0.823479000 |
| C | 2.475537000  | -1.116132000 | -2.716100000 |
| C | 3.335364000  | -1.462347000 | -1.605088000 |
| C | 0.135512000  | -1.432819000 | -3.526182000 |
| C | 1.365112000  | -1.967837000 | -3.010104000 |
| C | -0.947675000 | -2.230032000 | -3.019972000 |
| C | -2.389476000 | -0.262028000 | -3.009033000 |
| C | -2.208367000 | -1.649159000 | -2.713343000 |
| C | -2.634724000 | 1.920638000  | -2.181645000 |
| C | -3.200996000 | 0.585103000  | -2.179215000 |
| C | -1.673119000 | 3.780222000  | -0.819583000 |
| C | -2.762482000 | 2.829480000  | -1.069899000 |
| C | 0.211561000  | 4.119795000  | 0.564346000  |
| C | -1.259924000 | 4.140730000  | 0.568177000  |
| C | 2.334210000  | 3.119799000  | 1.408268000  |
| C | 1.029614000  | 3.670216000  | 1.672560000  |
| C | 3.818333000  | 1.280655000  | 1.440964000  |
| C | 2.913428000  | 2.097610000  | 2.239163000  |
| C | 4.209211000  | -1.037503000 | 0.566070000  |
| C | 4.012602000  | -0.136591000 | 1.719823000  |
| C | 2.969813000  | -2.568310000 | -0.764932000 |
| C | 3.453036000  | -2.297848000 | 0.563726000  |
| C | 1.037772000  | -3.094738000 | -2.180340000 |
| C | -0.402519000 | -3.273514000 | -2.180096000 |
| C | 1.807568000  | -3.388767000 | -1.030494000 |
| C | -1.126279000 | -3.846488000 | -1.071111000 |
| C | -2.938259000 | -2.219854000 | -1.601748000 |
| C | -2.490917000 | -3.369767000 | -0.817823000 |

|    |              |              |              |
|----|--------------|--------------|--------------|
| C  | -3.842250000 | 0.065087000  | -1.029475000 |
| C  | -3.715526000 | -1.351753000 | -0.763137000 |
| C  | -3.472639000 | 2.308842000  | 0.076371000  |
| C  | -3.990420000 | 0.949596000  | 0.079749000  |
| C  | -1.941520000 | 3.517479000  | 1.722630000  |
| C  | -3.066419000 | 2.634770000  | 1.443071000  |
| C  | 0.346213000  | 3.203203000  | 2.823299000  |
| C  | -1.102964000 | 3.069906000  | 2.813888000  |
| C  | 2.174486000  | 1.579649000  | 3.345725000  |
| C  | 0.908574000  | 2.172909000  | 3.653078000  |
| C  | 3.206960000  | -0.638552000 | 2.811638000  |
| C  | 2.360046000  | 0.200050000  | 3.639109000  |
| C  | 2.659016000  | -2.783845000 | 1.672822000  |
| C  | 2.598873000  | -1.960120000 | 2.823922000  |
| C  | 1.115110000  | -3.960724000 | 0.078711000  |
| C  | -0.320097000 | -4.204465000 | 0.076365000  |
| C  | 1.529843000  | -3.638379000 | 1.409902000  |
| C  | -0.804585000 | -4.013631000 | 1.445553000  |
| C  | 0.356009000  | -3.632889000 | 2.241877000  |
| C  | -3.005065000 | -3.188025000 | 0.570279000  |
| C  | -3.721763000 | -1.904415000 | 0.566757000  |
| C  | -2.129387000 | -3.472914000 | 1.725264000  |
| C  | -3.921344000 | 0.431180000  | 1.412367000  |
| C  | -3.325229000 | 1.444068000  | 2.242657000  |
| C  | -3.745353000 | -0.973343000 | 1.676007000  |
| C  | -1.404731000 | 1.915206000  | 3.640016000  |
| C  | -0.175071000 | 1.374287000  | 4.149665000  |
| C  | -2.506562000 | 1.063163000  | 3.347820000  |
| C  | 1.276707000  | -0.594248000 | 4.150092000  |
| C  | 1.426047000  | -1.932114000 | 3.654120000  |
| C  | 0.278745000  | -2.732514000 | 3.347837000  |
| C  | -0.017435000 | -0.029366000 | 4.367484000  |
| C  | -2.160334000 | -2.521811000 | 2.816643000  |
| C  | -2.999554000 | -1.333127000 | 2.826425000  |
| C  | -2.387466000 | -0.330172000 | 3.655342000  |
| C  | -1.009058000 | -2.204839000 | 3.642302000  |
| C  | -1.154170000 | -0.868741000 | 4.151523000  |
| N  | 0.000000000  | 0.000000000  | 0.000000000  |
| Dy | -0.922960000 | 1.816760000  | 0.318866000  |
| Dy | 2.037617000  | -0.132154000 | 0.298614000  |
| Gd | -1.117102000 | -1.736420000 | 0.316992000  |

**DyGd<sub>2</sub>N@C<sub>80</sub>**

|   |              |              |              |
|---|--------------|--------------|--------------|
| C | 1.003130000  | 2.135453000  | -2.924621000 |
| C | 2.143720000  | 2.415689000  | -2.096520000 |
| C | 3.020050000  | 1.257709000  | -2.096891000 |
| C | 1.154312000  | 0.803233000  | -3.440837000 |
| C | 2.387076000  | 0.263893000  | -2.936869000 |
| C | 0.017201000  | -0.032220000 | -3.654258000 |
| C | -1.274727000 | 0.534457000  | -3.440819000 |
| C | -0.289689000 | 2.671334000  | -2.629829000 |
| C | -1.423766000 | 1.871749000  | -2.937604000 |
| C | -0.417889000 | 3.587402000  | -1.517386000 |
| C | 2.014879000  | 3.229143000  | -0.946588000 |
| C | 0.723086000  | 3.824741000  | -0.678700000 |
| C | 2.858499000  | 2.914462000  | 0.161532000  |
| C | 3.884154000  | 0.919052000  | -0.990828000 |
| C | 3.792927000  | 1.797053000  | 0.158940000  |
| C | 4.148167000  | -0.502887000 | -0.736496000 |
| C | 2.512951000  | -1.118330000 | -2.629900000 |
| C | 3.372514000  | -1.464579000 | -1.519122000 |
| C | 0.172004000  | -1.434158000 | -3.439913000 |
| C | 1.401729000  | -1.969365000 | -2.924152000 |
| C | -0.911449000 | -2.231705000 | -2.934659000 |
| C | -2.352604000 | -0.262569000 | -2.922624000 |
| C | -2.171376000 | -1.649903000 | -2.627281000 |
| C | -2.599029000 | 1.921065000  | -2.095664000 |
| C | -3.164588000 | 0.584534000  | -2.093395000 |
| C | -1.637383000 | 3.779624000  | -0.734312000 |
| C | -2.731171000 | 2.833075000  | -0.985943000 |
| C | 0.247901000  | 4.109807000  | 0.650259000  |
| C | -1.222627000 | 4.135425000  | 0.654470000  |
| C | 2.370544000  | 3.110875000  | 1.492579000  |
| C | 1.066297000  | 3.662837000  | 1.757715000  |
| C | 3.868832000  | 1.281258000  | 1.529687000  |
| C | 2.954410000  | 2.092511000  | 2.324517000  |
| C | 4.242785000  | -1.037843000 | 0.652700000  |
| C | 4.056433000  | -0.138320000 | 1.808359000  |
| C | 3.006984000  | -2.570438000 | -0.679575000 |
| C | 3.487160000  | -2.297796000 | 0.649461000  |
| C | 1.074104000  | -3.096104000 | -2.094599000 |
| C | -0.366177000 | -3.275117000 | -2.094552000 |
| C | 1.844063000  | -3.389463000 | -0.944571000 |
| C | -1.089622000 | -3.847711000 | -0.985017000 |
| C | -2.900842000 | -2.219622000 | -1.515249000 |
| C | -2.453612000 | -3.369674000 | -0.731097000 |

|    |              |              |              |
|----|--------------|--------------|--------------|
| C  | -3.805889000 | 0.065045000  | -0.943812000 |
| C  | -3.678483000 | -1.351802000 | -0.676948000 |
| C  | -3.443333000 | 2.313763000  | 0.162297000  |
| C  | -3.954292000 | 0.950815000  | 0.165226000  |
| C  | -1.906206000 | 3.517320000  | 1.810201000  |
| C  | -3.035990000 | 2.638948000  | 1.531068000  |
| C  | 0.383641000  | 3.200149000  | 2.909594000  |
| C  | -1.066122000 | 3.067844000  | 2.899647000  |
| C  | 2.213105000  | 1.576036000  | 3.431610000  |
| C  | 0.946663000  | 2.169985000  | 3.738750000  |
| C  | 3.248045000  | -0.640931000 | 2.899167000  |
| C  | 2.398883000  | 0.197007000  | 3.726027000  |
| C  | 2.695385000  | -2.784776000 | 1.758589000  |
| C  | 2.637669000  | -1.961987000 | 2.910123000  |
| C  | 1.150628000  | -3.961154000 | 0.164557000  |
| C  | -0.284111000 | -4.207514000 | 0.162704000  |
| C  | 1.565349000  | -3.638588000 | 1.495552000  |
| C  | -0.769220000 | -4.018942000 | 1.532710000  |
| C  | 0.391661000  | -3.635382000 | 2.327884000  |
| C  | -2.968717000 | -3.189617000 | 0.656819000  |
| C  | -3.684912000 | -1.905172000 | 0.652696000  |
| C  | -2.094452000 | -3.477824000 | 1.812746000  |
| C  | -3.882794000 | 0.431031000  | 1.497077000  |
| C  | -3.288384000 | 1.444659000  | 2.327828000  |
| C  | -3.707582000 | -0.974007000 | 1.761215000  |
| C  | -1.367201000 | 1.913140000  | 3.725640000  |
| C  | -0.137384000 | 1.371825000  | 4.235417000  |
| C  | -2.469370000 | 1.061979000  | 3.433056000  |
| C  | 1.314487000  | -0.596923000 | 4.236406000  |
| C  | 1.463688000  | -1.934390000 | 3.739797000  |
| C  | 0.315644000  | -2.734404000 | 3.433570000  |
| C  | 0.019979000  | -0.031765000 | 4.452728000  |
| C  | -2.124281000 | -2.524690000 | 2.902763000  |
| C  | -2.962680000 | -1.334711000 | 2.911741000  |
| C  | -2.350404000 | -0.331510000 | 3.740244000  |
| C  | -0.972465000 | -2.206651000 | 3.727661000  |
| C  | -1.117274000 | -0.870426000 | 4.236593000  |
| N  | 0.000000000  | 0.000000000  | 0.000000000  |
| Dy | -0.919420000 | 1.804736000  | 0.395497000  |
| Gd | 2.051683000  | -0.098225000 | 0.386535000  |
| Gd | -1.079916000 | -1.741603000 | 0.406488000  |

**Gd<sub>3</sub>N@C<sub>80</sub>**

|   |              |              |              |
|---|--------------|--------------|--------------|
| C | 0.985662000  | 2.166013000  | -2.849424000 |
| C | 2.126318000  | 2.445812000  | -2.021405000 |
| C | 3.003003000  | 1.288078000  | -2.021595000 |
| C | 1.136496000  | 0.833463000  | -3.365009000 |
| C | 2.369719000  | 0.294122000  | -2.861875000 |
| C | -0.001217000 | -0.001314000 | -3.577585000 |
| C | -1.292794000 | 0.566718000  | -3.364075000 |
| C | -0.306906000 | 2.702966000  | -2.554045000 |
| C | -1.441752000 | 1.904335000  | -2.860893000 |
| C | -0.435132000 | 3.618346000  | -1.441952000 |
| C | 1.996700000  | 3.258429000  | -0.871067000 |
| C | 0.705753000  | 3.854331000  | -0.603614000 |
| C | 2.840855000  | 2.943090000  | 0.237206000  |
| C | 3.867702000  | 0.950442000  | -0.915290000 |
| C | 3.779496000  | 1.829184000  | 0.235173000  |
| C | 4.127845000  | -0.471754000 | -0.659700000 |
| C | 2.493928000  | -1.087779000 | -2.553916000 |
| C | 3.351932000  | -1.433548000 | -1.442459000 |
| C | 0.152744000  | -1.403748000 | -3.363513000 |
| C | 1.382368000  | -1.938973000 | -2.848009000 |
| C | -0.930755000 | -2.201524000 | -2.859047000 |
| C | -2.371004000 | -0.230013000 | -2.847010000 |
| C | -2.189536000 | -1.617881000 | -2.551382000 |
| C | -2.618245000 | 1.955936000  | -2.019293000 |
| C | -3.182549000 | 0.617953000  | -2.018153000 |
| C | -1.655168000 | 3.809596000  | -0.658080000 |
| C | -2.756864000 | 2.873281000  | -0.912650000 |
| C | 0.230224000  | 4.133588000  | 0.725652000  |
| C | -1.238932000 | 4.159692000  | 0.730628000  |
| C | 2.352699000  | 3.139492000  | 1.568065000  |
| C | 1.048558000  | 3.692124000  | 1.833461000  |
| C | 3.857526000  | 1.314016000  | 1.607567000  |
| C | 2.939148000  | 2.123252000  | 2.400697000  |
| C | 4.222779000  | -1.006081000 | 0.729512000  |
| C | 4.042060000  | -0.106551000 | 1.886393000  |
| C | 2.986320000  | -2.539034000 | -0.602961000 |
| C | 3.466048000  | -2.265350000 | 0.725781000  |
| C | 1.054819000  | -3.065662000 | -2.018636000 |
| C | -0.386102000 | -3.246096000 | -2.018134000 |
| C | 1.824177000  | -3.358792000 | -0.868519000 |
| C | -1.110076000 | -3.825133000 | -0.910920000 |
| C | -2.917001000 | -2.186779000 | -1.438607000 |
| C | -2.471623000 | -3.338981000 | -0.655173000 |

|    |              |              |              |
|----|--------------|--------------|--------------|
| C  | -3.820589000 | 0.099280000  | -0.867262000 |
| C  | -3.691153000 | -1.316785000 | -0.599838000 |
| C  | -3.472806000 | 2.357829000  | 0.238360000  |
| C  | -3.968528000 | 0.987959000  | 0.241069000  |
| C  | -1.926669000 | 3.553697000  | 1.888618000  |
| C  | -3.064739000 | 2.683118000  | 1.610618000  |
| C  | 0.365635000  | 3.233699000  | 2.986241000  |
| C  | -1.084755000 | 3.103251000  | 2.977164000  |
| C  | 2.195901000  | 1.607943000  | 3.507776000  |
| C  | 0.929540000  | 2.202966000  | 3.815012000  |
| C  | 3.231407000  | -0.609091000 | 2.975843000  |
| C  | 2.381335000  | 0.228794000  | 3.802285000  |
| C  | 2.675130000  | -2.751913000 | 1.834476000  |
| C  | 2.619524000  | -1.930047000 | 2.986323000  |
| C  | 1.129698000  | -3.931140000 | 0.240573000  |
| C  | -0.304466000 | -4.187220000 | 0.239154000  |
| C  | 1.544317000  | -3.605187000 | 1.570718000  |
| C  | -0.789130000 | -3.996187000 | 1.611625000  |
| C  | 0.371283000  | -3.604321000 | 2.403813000  |
| C  | -2.981608000 | -3.153338000 | 0.733801000  |
| C  | -3.693853000 | -1.868244000 | 0.729265000  |
| C  | -2.111760000 | -3.445985000 | 1.890765000  |
| C  | -3.893191000 | 0.466854000  | 1.571752000  |
| C  | -3.305326000 | 1.482916000  | 2.403662000  |
| C  | -3.719514000 | -0.938681000 | 1.837019000  |
| C  | -1.384432000 | 1.947790000  | 3.803407000  |
| C  | -0.154315000 | 1.405451000  | 4.312877000  |
| C  | -2.486152000 | 1.097151000  | 3.509630000  |
| C  | 1.296727000  | -0.564726000 | 4.312776000  |
| C  | 1.445348000  | -1.902310000 | 3.815690000  |
| C  | 0.296937000  | -2.702088000 | 3.509873000  |
| C  | 0.002674000  | 0.001492000  | 4.529501000  |
| C  | -2.141278000 | -2.491388000 | 2.979374000  |
| C  | -2.979355000 | -1.300789000 | 2.988866000  |
| C  | -2.367567000 | -0.297039000 | 3.816803000  |
| C  | -0.990162000 | -2.173180000 | 3.804587000  |
| C  | -1.134758000 | -0.836651000 | 4.313722000  |
| N  | 0.000000000  | 0.000000000  | 0.000000000  |
| Gd | -0.970761000 | 1.790634000  | 0.469269000  |
| Gd | 2.036894000  | -0.053563000 | 0.465964000  |
| Gd | -1.064256000 | -1.736530000 | 0.470065000  |

**Er<sub>3</sub>N@C<sub>80</sub>**

|   |              |              |              |
|---|--------------|--------------|--------------|
| C | 0.983094000  | 2.170093000  | -3.304176000 |
| C | 2.121918000  | 2.449150000  | -2.472343000 |
| C | 2.991357000  | 1.289573000  | -2.473763000 |
| C | 1.133460000  | 0.837967000  | -3.823831000 |
| C | 2.363773000  | 0.297102000  | -3.315775000 |
| C | -0.001935000 | 0.000797000  | -4.039183000 |
| C | -1.294497000 | 0.565629000  | -3.822767000 |
| C | -0.308383000 | 2.703916000  | -3.006668000 |
| C | -1.440889000 | 1.901191000  | -3.313649000 |
| C | -0.436109000 | 3.619618000  | -1.892967000 |
| C | 1.994995000  | 3.264190000  | -1.321507000 |
| C | 0.704363000  | 3.858803000  | -1.053596000 |
| C | 2.832411000  | 2.953414000  | -0.210839000 |
| C | 3.837018000  | 0.944070000  | -1.360315000 |
| C | 3.737422000  | 1.817624000  | -0.215725000 |
| C | 4.121361000  | -0.471753000 | -1.112670000 |
| C | 2.493052000  | -1.084975000 | -3.008878000 |
| C | 3.351281000  | -1.432121000 | -1.896081000 |
| C | 0.155366000  | -1.400941000 | -3.823477000 |
| C | 1.384845000  | -1.936717000 | -3.305258000 |
| C | -0.927642000 | -2.195803000 | -3.314066000 |
| C | -2.372730000 | -0.230915000 | -3.303002000 |
| C | -2.188934000 | -1.616488000 | -3.006254000 |
| C | -2.613609000 | 1.947821000  | -2.470843000 |
| C | -3.183037000 | 0.615051000  | -2.469939000 |
| C | -1.652580000 | 3.806158000  | -1.108910000 |
| C | -2.736847000 | 2.852345000  | -1.356814000 |
| C | 0.231562000  | 4.143837000  | 0.276912000  |
| C | -1.236947000 | 4.159850000  | 0.278375000  |
| C | 2.353783000  | 3.155574000  | 1.124406000  |
| C | 1.049609000  | 3.700024000  | 1.388211000  |
| C | 3.811024000  | 1.302826000  | 1.147609000  |
| C | 2.925920000  | 2.129281000  | 1.954222000  |
| C | 4.221528000  | -1.008404000 | 0.274450000  |
| C | 4.012381000  | -0.109021000 | 1.424892000  |
| C | 2.989578000  | -2.539623000 | -1.056334000 |
| C | 3.473894000  | -2.272374000 | 0.273569000  |
| C | 1.058080000  | -3.062312000 | -2.472774000 |
| C | -0.380824000 | -3.235425000 | -2.472696000 |
| C | 1.828716000  | -3.359910000 | -1.322600000 |
| C | -1.101568000 | -3.794922000 | -1.358480000 |
| C | -2.916946000 | -2.185634000 | -1.892417000 |
| C | -2.469504000 | -3.332651000 | -1.109317000 |



|    |              |              |              |
|----|--------------|--------------|--------------|
| C  | -3.824933000 | 0.096603000  | -1.319180000 |
| C  | -3.694354000 | -1.318736000 | -1.052173000 |
| C  | -3.442600000 | 2.328050000  | -0.212165000 |
| C  | -3.974045000 | 0.976305000  | -0.207707000 |
| C  | -1.910320000 | 3.527842000  | 1.428711000  |
| C  | -3.032592000 | 2.648043000  | 1.151106000  |
| C  | 0.367577000  | 3.229311000  | 2.538895000  |
| C  | -1.078567000 | 3.090254000  | 2.526240000  |
| C  | 2.192536000  | 1.609044000  | 3.061937000  |
| C  | 0.927869000  | 2.201698000  | 3.372289000  |
| C  | 3.218107000  | -0.610455000 | 2.522895000  |
| C  | 2.377553000  | 0.229051000  | 3.354514000  |
| C  | 2.681524000  | -2.758777000 | 1.385498000  |
| C  | 2.615405000  | -1.932133000 | 2.536070000  |
| C  | 1.142068000  | -3.929889000 | -0.211157000 |
| C  | -0.294260000 | -4.145815000 | -0.215091000 |
| C  | 1.557394000  | -3.616002000 | 1.123426000  |
| C  | -0.775980000 | -3.952066000 | 1.148610000  |
| C  | 0.383178000  | -3.598265000 | 1.954026000  |
| C  | -2.983711000 | -3.151650000 | 0.277832000  |
| C  | -3.704178000 | -1.871888000 | 0.277695000  |
| C  | -2.099464000 | -3.420926000 | 1.427547000  |
| C  | -3.908680000 | 0.459587000  | 1.126980000  |
| C  | -3.305295000 | 1.467612000  | 1.956993000  |
| C  | -3.728235000 | -0.942224000 | 1.389543000  |
| C  | -1.384842000 | 1.941968000  | 3.356784000  |
| C  | -0.155827000 | 1.402825000  | 3.869260000  |
| C  | -2.487295000 | 1.091505000  | 3.063672000  |
| C  | 1.296525000  | -0.565795000 | 3.867894000  |
| C  | 1.446047000  | -1.903428000 | 3.370362000  |
| C  | 0.300310000  | -2.702542000 | 3.061471000  |
| C  | 0.002333000  | -0.000751000 | 4.087304000  |
| C  | -2.135320000 | -2.481812000 | 2.525463000  |
| C  | -2.978484000 | -1.298640000 | 2.539245000  |
| C  | -2.367890000 | -0.300273000 | 3.372668000  |
| C  | -0.987068000 | -2.173110000 | 3.355540000  |
| C  | -1.134065000 | -0.839719000 | 3.868895000  |
| N  | 0.000000000  | 0.000000000  | 0.000000000  |
| Er | -0.882416000 | 1.856182000  | 0.019169000  |
| Er | 2.048705000  | -0.163796000 | 0.018372000  |
| Er | -1.165971000 | -1.692353000 | 0.022572000  |

**Lu<sub>3</sub>N@C<sub>80</sub>**

|   |              |              |              |
|---|--------------|--------------|--------------|
| C | 0.981679000  | 2.169750000  | -3.325681000 |
| C | 2.119107000  | 2.449493000  | -2.491351000 |
| C | 2.984102000  | 1.289506000  | -2.493926000 |
| C | 1.132457000  | 0.838211000  | -3.848186000 |
| C | 2.361987000  | 0.297603000  | -3.338623000 |
| C | -0.002605000 | 0.000045000  | -4.064069000 |
| C | -1.295844000 | 0.564042000  | -3.847034000 |
| C | -0.309104000 | 2.699981000  | -3.026859000 |
| C | -1.442090000 | 1.898855000  | -3.336614000 |
| C | -0.433189000 | 3.608706000  | -1.907634000 |
| C | 1.995738000  | 3.264328000  | -1.338948000 |
| C | 0.705862000  | 3.853589000  | -1.068823000 |
| C | 2.827929000  | 2.957907000  | -0.224659000 |
| C | 3.810330000  | 0.940441000  | -1.370977000 |
| C | 3.712319000  | 1.811608000  | -0.229572000 |
| C | 4.099595000  | -0.469492000 | -1.123134000 |
| C | 2.489778000  | -1.083974000 | -3.028533000 |
| C | 3.339978000  | -1.430198000 | -1.909985000 |
| C | 0.155984000  | -1.401991000 | -3.847764000 |
| C | 1.385104000  | -1.937050000 | -3.326265000 |
| C | -0.926409000 | -2.195985000 | -3.336554000 |
| C | -2.373511000 | -0.232445000 | -3.324155000 |
| C | -2.186640000 | -1.615489000 | -3.025742000 |
| C | -2.611490000 | 1.941292000  | -2.490830000 |
| C | -3.183462000 | 0.612137000  | -2.488379000 |
| C | -1.644349000 | 3.786174000  | -1.119685000 |
| C | -2.721363000 | 2.830921000  | -1.367094000 |
| C | 0.234547000  | 4.139647000  | 0.262666000  |
| C | -1.231307000 | 4.143985000  | 0.263205000  |
| C | 2.354289000  | 3.161979000  | 1.113345000  |
| C | 1.050382000  | 3.700490000  | 1.376879000  |
| C | 3.784653000  | 1.297292000  | 1.129717000  |
| C | 2.919395000  | 2.132539000  | 1.943334000  |
| C | 4.205025000  | -1.005620000 | 0.259848000  |
| C | 3.989909000  | -0.108943000 | 1.406549000  |
| C | 2.984030000  | -2.539024000 | -1.070498000 |
| C | 3.468827000  | -2.273125000 | 0.260340000  |
| C | 1.059661000  | -3.061268000 | -2.490871000 |
| C | -0.377354000 | -3.230261000 | -2.492136000 |
| C | 1.828473000  | -3.361259000 | -1.338909000 |
| C | -1.091444000 | -3.770649000 | -1.368034000 |
| C | -2.910067000 | -2.178173000 | -1.906109000 |
| C | -2.457112000 | -3.316064000 | -1.119324000 |

|    |              |              |              |
|----|--------------|--------------|--------------|
| C  | -3.826404000 | 0.096865000  | -1.335585000 |
| C  | -3.691405000 | -1.315085000 | -1.066332000 |
| C  | -3.425267000 | 2.309119000  | -0.225355000 |
| C  | -3.976099000 | 0.970034000  | -0.220638000 |
| C  | -1.899069000 | 3.508088000  | 1.410148000  |
| C  | -3.014855000 | 2.627801000  | 1.133763000  |
| C  | 0.369196000  | 3.226930000  | 2.528429000  |
| C  | -1.074317000 | 3.082046000  | 2.513705000  |
| C  | 2.191179000  | 1.611182000  | 3.053373000  |
| C  | 0.928096000  | 2.203048000  | 3.366306000  |
| C  | 3.208866000  | -0.609576000 | 2.510774000  |
| C  | 2.374654000  | 0.230781000  | 3.345512000  |
| C  | 2.681737000  | -2.759682000 | 1.375506000  |
| C  | 2.612570000  | -1.931874000 | 2.526486000  |
| C  | 1.148253000  | -3.928220000 | -0.223655000 |
| C  | -0.286675000 | -4.120416000 | -0.227484000 |
| C  | 1.563039000  | -3.619606000 | 1.113698000  |
| C  | -0.767117000 | -3.925862000 | 1.131999000  |
| C  | 0.389367000  | -3.593742000 | 1.944503000  |
| C  | -2.973012000 | -3.138952000 | 0.263841000  |
| C  | -3.702432000 | -1.867404000 | 0.264640000  |
| C  | -2.087445000 | -3.400500000 | 1.409892000  |
| C  | -3.914759000 | 0.456742000  | 1.117002000  |
| C  | -3.304825000 | 1.460457000  | 1.946924000  |
| C  | -3.729185000 | -0.941615000 | 1.379246000  |
| C  | -1.384442000 | 1.939072000  | 3.347946000  |
| C  | -0.155740000 | 1.403112000  | 3.863956000  |
| C  | -2.488247000 | 1.089972000  | 3.055830000  |
| C  | 1.296558000  | -0.565074000 | 3.862741000  |
| C  | 1.446991000  | -1.903354000 | 3.365354000  |
| C  | 0.302830000  | -2.701841000 | 3.053863000  |
| C  | 0.002501000  | -0.000185000 | 4.083705000  |
| C  | -2.129832000 | -2.473314000 | 2.513683000  |
| C  | -2.976874000 | -1.295652000 | 2.529914000  |
| C  | -2.368663000 | -0.300210000 | 3.367722000  |
| C  | -0.984353000 | -2.170478000 | 3.346991000  |
| C  | -1.133830000 | -0.838914000 | 3.863954000  |
| N  | 0.000000000  | 0.000000000  | 0.000000000  |
| Lu | -0.834876000 | 1.873844000  | 0.006041000  |
| Lu | 2.040573000  | -0.214602000 | 0.006486000  |
| Lu | -1.206478000 | -1.659500000 | 0.008941000  |

## References

1. Mueller, U.; Förster, R.; Hellmig, M.; Huschmann, F. U.; Kastner, A.; Malecki, P.; Pühringer, S.; Röwer, M.; Sparta, K.; Steffien, M.; Ühlein, M.; Wilk, P.; Weiss, M. S., The macromolecular crystallography beamlines at BESSY II of the Helmholtz-Zentrum Berlin: Current status and perspectives. *Eur. Phys. J. Plus* **2015**, *130*, 141.
2. Sparta, K. M.; Krug, M.; Heinemann, U.; Mueller, U.; Weiss, M. S., XDSAPP2.0. *J. Appl. Crystallogr.* **2016**, *49*, 1085-1092.
3. Sheldrick, G., Crystal structure refinement with SHELXL. *Acta Cryst. C* **2015**, *71*, 3-8.
